# Supplementary figures and images for: Electric oscillation and coupling of chromatin regulate chromosome packaging and transcription in eukaryotic cells
Source: Springer Nature journal article supplement (doi:10.1186/1742-4682-9-27), 2012-07-03

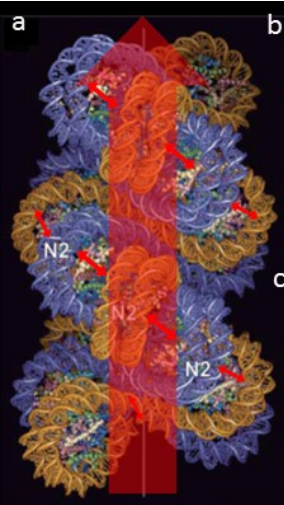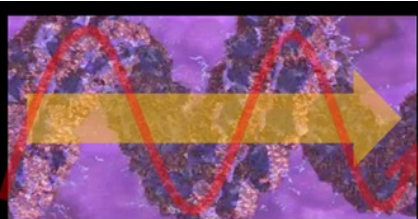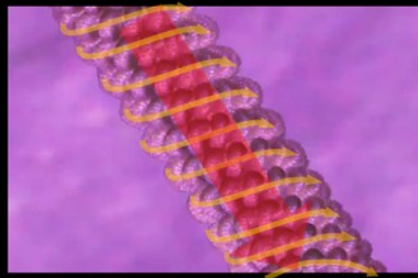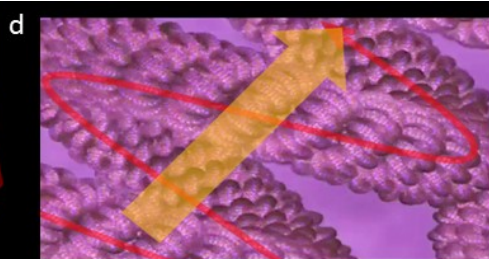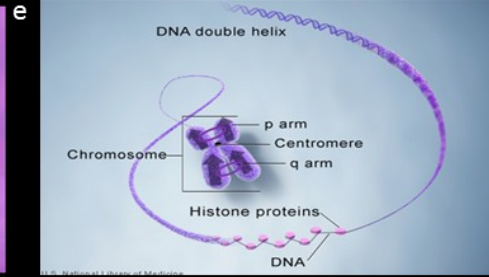

Supplement: 12976_2012_344_MOESM1_ESM.pdf [file 12976_2012_344_MOESM1_ESM.pdf]
